1           **The Evolution of Nest Site Specialization and its Macroevolutionary**  
2                           **Consequences in Passerine Birds**

3

4 Rosana Zenil-Ferguson<sup>1\*</sup>

5 Jay P. McEntee<sup>2</sup>

6 J. Gordon Burleigh<sup>3</sup>

7 Renée A. Duckworth<sup>4</sup>

8

9

10 <sup>1</sup> *School of Life Sciences, University of Hawai'i Mānoa, 1800 East-West Rd, Honolulu,*  
11 *HI 96822;*

12 <sup>2</sup> *Department of Biology, Missouri State University, 901 S. National Ave., Springfield,*  
13 *MO 65897 USA;*

14 <sup>3</sup> *Department of Biology, University of Florida, 220 Bartram Hall, P.O. Box 118525,*  
15 *Gainesville, FL 32611;*

16 <sup>4</sup> *Department of Ecology and Evolutionary Biology, University of Arizona, 1041 E. Lowell*  
17 *St., Tucson, AZ 85721 USA;*

18 \* *E-mail: roszenil@hawaii.edu*

*Zenil-Ferguson, R.; McEntee, J.P.; Burleigh, J.G.; and Duckworth, R.A. - Nest type linked to diversification*

19 *Abstract.* – A long-standing hypothesis in evolutionary biology is that the evolution of  
20 resource specialization can lead to an evolutionary dead end, where specialists have  
21 low diversification rates and limited ability to evolve into generalists. However, in recent  
22 years, advances in comparative methods investigating trait-based differences  
23 associated with diversification have enabled more robust tests of this idea and have  
24 found mixed support. Here we test the evolutionary dead end hypothesis by estimating  
25 net diversification rate differences associated with nest site specialization among 3,224  
26 species of passerine birds. In particular, we test whether the adoption of hole-nesting, a  
27 nest site specialization that decreases predation, results in reduced diversification rates  
28 relative to nesting outside of holes. Further, we examine whether evolutionary  
29 transitions to the specialist hole-nesting state have been more frequent than transitions  
30 out of hole-nesting. Using diversification models that accounted for background rate  
31 heterogeneity and different extinction rate scenarios, we found that hole-nesting  
32 specialization was not associated with diversification rate differences. Furthermore,  
33 contrary to the assumption that specialists rarely evolve into generalists, we found that  
34 transitions out of hole-nesting occur more frequently than transitions into hole-nesting.  
35 These results suggest that interspecific competition may limit adoption of hole-nesting,  
36 but that such competition does not result in limited diversification of hole-nesters. In  
37 conjunction with other recent studies using robust comparative methods, our results add  
38 to growing evidence that evolutionary dead ends are not a typical outcome of resource  
39 specialization.

40 *Keywords:* diversification, hidden-state models, cavity nesting, passerines, resource  
41 specialization

*Zenil-Ferguson, R.; McEntee, J.P.; Burleigh, J.G.; and Duckworth, R.A. - Nest type linked to diversification*

42 Resource specialization, where species use a narrower range of resources  
43 compared to related taxa, is a common phenomenon in evolution. There are many  
44 reasons resource specialization (hereafter specialization) can evolve. For example,  
45 specialists can benefit from reduced competition, or from the avoidance of predators or  
46 parasites (Futuyma and Moreno 1988; Bernays 1989; Schluter 2000). Once evolved,  
47 specialization can have diverse consequences for macroevolutionary dynamics.  
48 Historically, specialization often has been considered an evolutionary dead end,  
49 resulting in both reduced net diversification relative to generalists, and difficulty evolving  
50 from specialist to generalist. This difficulty may arise when adaptation to specialized  
51 resources occurs across numerous traits (Futuyma and Moreno 1988), and, when  
52 coupled with changes in resource availability, can lead to elevated extinction rates in  
53 specialists. Additionally, reduced diversification of specialists could result if the number  
54 of available niches in the specialized state is low.

55 Consistent with the evolutionary dead end view of specialists, the prevailing  
56 historical viewpoint was that specialists evolve from generalist ancestors (Schluter  
57 2000). Prior studies have found mixed support for this viewpoint, with inferences from  
58 phylogenetic comparative methods showing that generalists regularly evolve from  
59 specialists in many clades (Day et al. 2016; Sexton et al. 2017; Villastrigo et al. 2021).  
60 These results indicate that the dominant direction of evolutionary transitions involving  
61 specialization should be treated as an open question for any specialization scenario.

62 More recent studies have also noted the potential for specialization to lead to  
63 increased diversification through multiple mechanisms. First, the release of specialists  
64 from the effects of competition and/or predation could trigger periods of niche-filling

*Zenil-Ferguson, R.; McEntee, J.P.; Burleigh, J.G.; and Duckworth, R.A. - Nest type linked to diversification*

65 diversification (Schluter 2000), leading to higher rates of speciation in specialists  
66 compared to generalists. Further, in circumstances where specialization releases  
67 specialists from competition or predation (Futuyma and Moreno 1988), specialists may  
68 experience greater population persistence than generalists, which could increase  
69 diversification rates by decreasing extinction rates or by increasing rates of allopatric  
70 speciation via the longer survival of nascent lineages (Harvey et al. 2019), or both.  
71 Finally, specialist lineages could also have higher diversification rates if more  
72 specialized lineages have more fragmented distributions or lower rates of dispersal  
73 (Gavrilets et al. 2000; Birand et al. 2012).

74       New diversification models and statistical developments have the potential to  
75 alter our conclusions on the macroevolutionary consequences of specialization. A  
76 growing awareness of type I error (Davis et al. 2013; Rabosky and Goldberg 2015), the  
77 importance of large sample sizes for statistical power (Davis et al. 2013; Day et al.  
78 2016), and the misspecification of the null hypothesis for the original state-dependent  
79 diversification models (Beaulieu and O'Meara 2016; Rabosky and Goldberg 2017;  
80 Caetano et al. 2018) have produced a wave of new studies using robust statistical  
81 approaches on the question of whether specialization is linked to diversification. The  
82 majority of studies after Day et al.'s (2016) review on specialization have found either no  
83 association between specialization and diversification (e.g. Alhajeri and Steppan 2018;  
84 Crouch and Ricklefs 2019; Villastrigo et al. 2020) or have found that specialization is  
85 associated with higher diversification rates (e.g. Conway and Olsen 2019; Otero et al.  
86 2019; Tonini et al. 2020), with few studies indicating specialization leads to an  
87 evolutionary dead end (e.g. Cyriac and Kodandaramaiah 2018; Day et al. 2016). These

*Zenil-Ferguson, R.; McEntee, J.P.; Burleigh, J.G.; and Duckworth, R.A. - Nest type linked to diversification*

88 new results seem to indicate that specialization rarely leads to evolutionary dead ends.

89 While these newer studies are using trees with more tips and more transitions to

90 specialist states, which can help disentangle consequences of specialization in

91 diversification (Davis et al. 2013), moving forward it is necessary to integrate new

92 methods that incorporate heterogeneity in the diversification process unlinked from

93 specialization (Beaulieu and O'Meara 2016).

94 Here we examine the evolution of specialization of nesting microhabitat and its

95 macroevolutionary consequences using nesting site data for 3,224 species of passerine

96 birds. Passerines provide a unique opportunity to examine the importance of hole-

97 nesting as an example of resource specialization that may drive diversification patterns

98 using phylogenetic comparative methods. First, there are over 6,000 species of

99 passerines, and hole-nesting behavior has evolved multiple times across the clade,

100 providing numerous transitions to estimate rates of diversification linked to trait evolution

101 (Davis et al. 2013). Second, passerines can be grouped into three general nesting

102 habits: open-cup nesters, dome nesters and hole nesters (e.g. Wallace 1868; Martin

103 1995; Collias 1997). Open-cup and dome nesters are relatively unspecialized in their

104 nesting substrate compared to hole-nesters; however, dome nesters also have reduced

105 predation rates compared to open-cup nesters (Oniki 1979; Linder and Bollinger 1995;

106 Auer et al. 2007; Martin et al. 2017). Therefore, our approach of comparing adoption of

107 these three nest types enables us to assess the potential effects of nest site

108 specialization versus escape from predation on diversification rates (Fig. 1).

109 Nest site selection is a critically important aspect of avian habitat because nest

110 failure rates are high in birds (Nice 1957), and predation is the main cause of nestling

*Zenil-Ferguson, R.; McEntee, J.P.; Burleigh, J.G.; and Duckworth, R.A. - Nest type linked to diversification*

111 mortality (Ricklefs 1969; Martin 1993). Adoption of hole-nesting has the advantage of  
112 protecting offspring from predation, and non-excavating hole nesters show an  
113 approximate 43% reduction in nest failure compared to non-hole nesters (Martin 1995).  
114 Thus, the main ecological consequence of hole-nesting specialization is that it provides  
115 release from predation. Hole-nesting represents resource specialization for two  
116 reasons: the great majority of species that nest in holes do so obligately, and exclusive  
117 use of holes greatly restricts the substrates that are suitable for nest building.

118         Hole-nesting is associated with the evolution of a suite of traits, such as  
119 increased nesting period, brighter egg coloration, and larger clutch sizes, that may  
120 make it difficult to transition out of hole-nesting (Martin and Li 1992; Kilner 2006).  
121 Moreover, the great majority of hole-nesting passerines cannot excavate their own nest  
122 holes, and competition for this limited resource is intense (Newton 1994). While hole-  
123 nesting likely evolves as a response to predation pressure, the intense competition for  
124 nesting sites decreases nest hole availability (Cockle et al. 2011). This competition may  
125 limit ecological opportunity for hole-nesting lineages despite the reduction in predation  
126 pressure. Further, reliance on holes for nesting may increase extinction risk when  
127 environmental changes reduce nest hole availability, particularly if transitioning from  
128 hole-nesting is difficult. This combination of characteristics makes hole-nesting in  
129 passerines a form of specialization that could be an evolutionary dead end. However, as  
130 hole-nesting decreases nest predation, it is also possible that adopting hole-nesting  
131 could lead to greater population persistence over time which, in turn, could lead to  
132 reduced extinction rates or increased rates of allopatric speciation (Harvey et al. 2019).

*Zenil-Ferguson, R.; McEntee, J.P.; Burleigh, J.G.; and Duckworth, R.A. - Nest type linked to diversification*

133 Thus it is also possible that hole-nesting lineages could experience greater  
134 diversification rates than the more generalist nonhole-nesting lineages.

135 The evolutionary dead end hypothesis assumes that it is easy to adopt hole-  
136 nesting habits, but difficult to transition out of them because of secondary adaptations  
137 that restrict evolutionary transitions (Collias and Collias 1984). In passerines, most hole  
138 nesters are secondary (i.e., they cannot make new cavities, and thus they rely on what  
139 is already in the environment), and so adoption of hole-nesting is mainly a behavioral  
140 shift not requiring extensive morphological modification (although see above for  
141 examples of life history traits associated with hole-nesting). This could make it relatively  
142 easy to evolve hole-nesting behavior. However, the intense competitive environment  
143 that hole nesters face could mean that hole-nesting niches are already saturated,  
144 making it a more difficult habit to adopt. To examine these possibilities, we not only  
145 assess the impact of nest type on diversification rates, but we also calculate transition  
146 rates among them.

147 We employ a graphical modeling approach (Jordan 2004) using Bayesian  
148 statistics to infer parameters of state-dependent speciation and extinction models (SSE  
149 models), and diversification-free models (Mkn models) coded in RevBayes software  
150 (Höhna et al. 2016). The large dataset and Bayesian framework enable us to avoid a  
151 number of common pitfalls for similar studies on diversification. Additionally, we adopt a  
152 systematic approach to specifying prior distributions to model extinction rates that  
153 allows us to assess the consistency of estimates and inference across a spectrum of  
154 macroevolutionary diversification scenarios. Finally, after determining the best model,  
155 we used it to reconstruct ancestral states of nest types to visualize the pattern of

*Zenil-Ferguson, R.; McEntee, J.P.; Burleigh, J.G.; and Duckworth, R.A. - Nest type linked to diversification*

156 evolutionary history for the trait and compare with previous ancestral state  
157 reconstructions.

## 158 MATERIALS AND METHODS

### 159 *Data*

160 Our nesting data is a slightly adapted version of a dataset originally assembled  
161 for McEntee et al. (2018). This dataset was generated by scoring the nesting behavior  
162 of the passerine species using descriptions from the Handbook of the Birds of the World  
163 Alive, (Del Hoyo et al. 2017, last accessed 30 June 2016, hereafter HBW). Specifically,  
164 species' nests were scored as either open-cup, dome, hole, or some combination of two  
165 of these three nest types for the few species that show flexible nest type use. "Hole"  
166 refers to any nest built inside a tree cavity, rock crevice, or earthen bank. The small  
167 number of brood parasites were excluded from analyses. McEntee et al. (2018) were  
168 able to score the nest types for approximately three quarters of the 5,912 passerine  
169 species from the information in the HBW species descriptions.

170 Next, we matched the passerine species in the nesting dataset to the species'  
171 names on the tips of the avian supermatrix phylogeny of Burleigh et al. (2015), one of  
172 the largest phylogenetic trees of birds constructed exclusively from molecular data. This  
173 tree was time-calibrated using penalized likelihood in r8s (Sanderson 2003) with twenty  
174 fossil calibrations from throughout the avian phylogeny (Baiser et al. 2018). We  
175 identified all cases in which a species in the Burleigh et al. (2015) phylogenetic tree,  
176 which used the Clements taxonomy, did not have a corresponding species with the  
177 exact same name in the dataset from the HBW Alive/BirdLife International taxonomy.  
178 This was due to either missing nesting data or a taxonomic mismatch. For taxonomic



*Zenil-Ferguson, R.; McEntee, J.P.; Burleigh, J.G.; and Duckworth, R.A. - Nest type linked to diversification*

179 mismatches, we examined the taxonomic history for these species in Avibase  
180 (<https://avibase.bsc-eoc.org/>), and when appropriate, changed the species name in the  
181 nest dataset to match the phylogenetic tree (Burleigh et al. 2015). Taxa treated as  
182 subspecies in the HBW taxonomy (2015) but as taxa in Burleigh et al. (2015) were not  
183 included in our analyses because they did not occur as tips in the phylogenetic tree. We  
184 then trimmed the phylogenetic tree to include only species in the nesting dataset from  
185 HBW. The resulting data set has the nesting state for 3,224 passerine species. Of  
186 these, 1943 species had dome nests (*D*), 722 had cup nests (*C*), and 458 had hole  
187 nests (*H*). Among species with multiple nest types, 60 were cup or hole nesters (*CH*),  
188 29 were dome or cup nesters (*DC*), and 13 were dome or hole nesters (*DH*). In the few  
189 instances (less than 1% of internal nodes) where this tree was not bifurcating (required  
190 for the diversification analyses described below) because nodes were collapsed in the  
191 r8s analysis, we resolved bifurcations randomly using the function `multi2di` from the  
192 R package `ape` (Paradis and Schliep 2019).

### 193 *Diversification models with different numbers of states*

194 Using the three states assigned to the tips of the 3,225-taxon phylogenetic tree  
195 (3,224 passerines plus a single species representing the parrot outgroup), we defined  
196 four state-dependent speciation and extinction models (SSEs). The first multistate SSE  
197 model, called MuSSE-3 here, uses three main states: dome *D*, cup *C*, and hole *H* (Fig.  
198 2a), each with their own speciation and extinction rate (Fig. 2a). MuSSE-3 also has  
199 transition rates between each state ( $q_{ij}$  with  $i, j = D, C, H$ , and  $i \neq j$ ) governing the rate  
200 of evolution from one nest type to another. All transitions between nest types are

*Zenil-Ferguson, R.; McEntee, J.P.; Burleigh, J.G.; and Duckworth, R.A. - Nest type linked to diversification*

201 possible. Taxa that have multiple nest types are coded in the input data as belonging to  
202 multiple states simultaneously. For example, a bird taxon reported to have nested in  
203 both hole and dome nests is coded in the input data as  $(H, D)$ . For taxa (tips) with two  
204 nest types, the likelihood calculation includes the product of two transition probabilities  
205 from the most recent common ancestor to each potential state in the tips instead of a  
206 single transition probability from the most recent common ancestor to one single state.

207         The second model is a six state SSE called MuSSE-6 in which the six main  
208 states represent not only dome  $D$ , cup  $C$ , and hole  $H$  nest types, but also all the  
209 pairwise combinations of multiple nest types (dome and cup  $(DC)$ , dome and hole  $(DH)$ ,  
210 and cup and hole  $(CH)$ , Fig. 2a) to account for those species that show flexibility in nest  
211 type use. MuSSE-6 includes speciation and extinction rate parameters linked only to the  
212  $D$ ,  $C$ , and  $H$  states. Transition rates between all states are possible except transitions  
213 between those states representing two different nest types and the single nest type  
214 state not including either of these nest types (e.g. state  $DC$  does not connect with state  
215  $H$  since that represents a double transition, Fig. 2b). The MuSSE-6 model helped us  
216 identify the most appropriate way to score states when taxa can use more than one nest  
217 type.

218         The third and fourth models are the hidden state extensions of the MuSSE-3 and  
219 MuSSE-6 respectively. The hidden state extension is necessary to avoid null  
220 hypothesis misspecification since the null hypothesis should include background  
221 heterogeneity in the diversification rate that is not linked to the trait of interest (fulfilled  
222 by character-independent models thoroughly discussed in Beaulieu and O'Meara  
223 (2016), and Caetano et al. (2018). For both the three-state model and the six-state

*Zenil-Ferguson, R.; McEntee, J.P.; Burleigh, J.G.; and Duckworth, R.A. - Nest type linked to diversification*

224 model, we expanded the three single nest type states to six with subscripts *A* or  
225 *B*. These models are the MuHiSSE-3 and MuHiSSE-6 respectively (Fig. 2).

226

227 *Diversification models with different assumptions about extinction rates*

228 Fossil records for passerines suggest rapid turnover of diversity over time, with  
229 high species diversity and diversification rates (Jetz et al. 2012; Marshall 2017) despite  
230 the extinctions of entire early passerine lineages (Hieronymus et al. 2019; Ksepka et al.  
231 2019), high turnover of passerines within Europe between the Oligocene and the  
232 present (Manegold 2008; Bochenski et al. 2021), and the impact of late Pleistocene  
233 species extinctions (Steadman et al. 2015; Oswald and Steadman 2018). Diversification  
234 models using phylogenetic trees with only extant taxa often appear to underestimate the  
235 rates of extinction (Höhna et al. 2011; Louca and Pennell 2021), producing error in  
236 many diversification analyses (Stadler 2013). This presents a potential problem in the  
237 passerines because of the fossil evidence that turnover has been high (see also  
238 Marshall's third law of paleobiology: the average extinction rate approximately equals  
239 the average origination rate; Marshall 2017).

240 In a Bayesian framework, one way to incorporate knowledge about higher  
241 extinction rates is by using a prior distribution that accommodates independent  
242 information about the magnitude of the rates. Therefore, in our three-state, six-state,  
243 and hidden-state models, we defined prior distributions for the extinction rates with  
244 enhanced lower bounds, and we systematically increased these lower bounds across  
245 model fits (Table A1). We specified these lower bounds by making extinction rates'  
246 lower bound to be dependent on speciation rates. In mathematical form, we defined this

Zenil-Ferguson, R.; McEntee, J.P.; Burleigh, J.G.; and Duckworth, R.A. - Nest type linked to diversification

247 process by using the linear function for extinction rates as  $\mu_i = A * \lambda_i + \delta$  where  $A =$   
248 0.7, 0.8, 0.9, 1, 1.1, 1.2, for all the states  $i = D, C, H$ . Therefore, the extinction rates are a  
249 linear combination of random variables. The speciation rates  $\lambda_i$  have a log-normal prior  
250 distribution with hyperparameters  $(\mu_\lambda = \ln(\frac{3225}{2}), \sigma_\lambda = 1.12)$  and the second random  
251 variable of the linear function, represented by the parameter  $\delta$ , is distributed as  $Exp(2)$ .  
252 Defining extinction rate prior distribution as a linear combination of random variables,  
253 allowed us to fix the value  $A$  as the lower bound for the extinction fraction  $a_i = \frac{\mu_i}{\lambda_i}$  (we  
254 use the same definition of extinction fraction as (Beaulieu and O'Meara 2016) while  
255 permitting extra variability in the diversification rates, so that extinction rates are not fully  
256 a deterministic function of speciation rates. For example, the extinction rate of taxa with  
257 dome nests that is at least 80% of the speciation rate is defined with the equation  $\mu_D =$   
258  $0.8 * \lambda_D + \delta$ . In this example the posterior estimation of the extinction fraction for state  
259 Dome ( $a_D = \frac{\mu_D}{\lambda_D}$ ) is forced to be at least 80%, but the extinction fraction can still be larger  
260 than the bound of 0.8 thanks to random variable  $\delta$  (i.e.  $a_D = \frac{\mu_D}{\lambda_D} > 0.8$ ). In most of our  
261 models, prior distributions for extinction rates were defined equally (i.e.  $\mu_D = \mu_C =$   
262  $\mu_H = A * \lambda_D + \delta$ ). In one model, we specified  $\mu_H < \mu_D < \mu_C$  by making  $A = 0.6, 0.7,$  and  
263 0.8 respectively to verify that: 1) our inferences weren't driven by this specification of the  
264 prior; and 2) that likelihood is informative given our dataset (supplementary Fig. S11).

265

266 *Testing the role of diversification in nest type evolution*

267 To test if nest type evolution is linked to the diversification of passerines, we  
268 calculated the marginal log-likelihoods for the MuSSE-3 and the character independent

*Zenil-Ferguson, R.; McEntee, J.P.; Burleigh, J.G.; and Duckworth, R.A. - Nest type linked to diversification*

269 model (CID-3). It is important to notice that in the CID-3 notation the 3 refers to the  
270 number of hidden states that have different diversification rates, and not necessarily the  
271 number of states of the main trait, to compare against the correct null hypothesis as  
272 discussed in Caetano et al. (2018). We calculated Bayes factors (Kass and Raftery  
273 1995) to compare CID-3 against the MuSSE-3 model. To approximate the marginal log-  
274 likelihood we calculated 18 stepping stones using the methodology from Xie et al.  
275 (2011). We calculated the difference between the log-marginal likelihoods of CID-3 and  
276 MuSSE-3 models using the statistic  $\kappa$  defined as  $\kappa = \ln(P(X|CID - 3)) - \ln(P(X|MuSSE -$   
277  $3))$ , where  $X$  represents our state sample and the phylogenetic tree. If  $\kappa$  has a value  
278 larger than 1, then the CID-3 model is preferred. The MuSSE-3 model is preferred when  
279  $\kappa < -1$ . The test statistic is inconclusive when  $\kappa$  has a value in the interval  $(-1, 1)$ . We  
280 did not calculate marginal log-likelihood for a CID-6 model to compare against the  
281 MuHiSSE-3 because CID-6 would require the estimation of too many parameters (36 in  
282 total: 12 diversification rates, 6 transition rates, 12 hidden state transition rates  
283 parameters, and 6 frequency parameters for the root), and, as discussed in the results,  
284 we found strong evidence that nest type is not linked to diversification using the much  
285 simpler CID-3 and the MuSSE-3.

286

287 *Ancestral state reconstruction using diversification-free models*

288 It was important to verify the most probable state at the root since previous  
289 studies have found that hole is the most likely state at the root, suggesting that all  
290 passerines descend from an already specialized nest type. The results showed that  
291 nest type evolution is not linked to the diversification process (see Results section).

*Zenil-Ferguson, R.; McEntee, J.P.; Burleigh, J.G.; and Duckworth, R.A. - Nest type linked to diversification*

292 Therefore, we defined both three-state (Mk3, Fig. 2a) and six-state (Mk6, Fig. 2b)  
293 Markov models without diversification parameters (hereafter, “diversification-free  
294 models”) to reconstruct the ancestral nest type in passerines. We calculated the  
295 marginal ancestral state reconstruction at each of the internal nodes. Since our  
296 reconstructions use a Bayesian framework, in each of the nodes we plot the state with  
297 the maximum *a posteriori* value of the marginal posterior distribution (Fig. 5), as  
298 previously done in Freyman and Höhna (2018), and Zenil-Ferguson et al. (2019)  
299 implemented in RevBayes (Höhna et al. 2016). For all of our estimations, we treated the  
300 root as a stochastic vector whose posterior distribution needed to be jointly estimated  
301 along with the diversification and transition parameters (see numbers of parameters in  
302 Fig. 2). For the Musse-3 model, the stochastic vector we chose at the root was  
303 composed of three frequencies that sum up to 1 (for dome, cup, and hole respectively)  
304 and that stochastic vector had a Dirichlet distribution with parameter  $(1/3, 1/3, 1/3)$  as  
305 the prior distribution. We calculated the posterior distribution for this stochastic vector  
306 via our MCMC algorithms.

307

### 308 *Implementation of models and inferences*

309 All the diversification and diversification-free models in Fig. 2 were implemented  
310 as graphical models in RevBayes (Höhna et al. 2016). We customized and ran a  
311 Markov chain Monte Carlo (MCMC; Metropolis et al. 1953; Hastings 1970) algorithm to  
312 sample the posterior distribution of each model. For all the models (diversification and  
313 diversification-free), we assumed that the state value at the root was unknown, and we  
314 estimated the posterior distribution of the frequencies at the root. The prior distribution

*Zenil-Ferguson, R.; McEntee, J.P.; Burleigh, J.G.; and Duckworth, R.A. - Nest type linked to diversification*

315 of the root values was defined via a Dirichlet distribution with uniform frequencies  
316 across the number of states for each model. Convergence and effective sample sizes of  
317 at least 250 for every parameter in the MCMC were assessed using Tracer (Rambaut et  
318 al. 2018) and two chains were run per model to verify convergence. Each MCMC run  
319 was performed in the HiPerGator cluster at the University of Florida, and took an  
320 average of 240 hours to converge. All our implementations and results are available at  
321 <https://github.com/roszenil/nestdivmodel>.

322

## 323 RESULTS

### 324 *Diversification is not linked to nest type*

325 While our MuSSE models found associations between nest type and  
326 diversification rates, our MuHiSSE models showed that these associations were  
327 spurious. This is because the addition of hidden states accounts for the possibility that  
328 diversification is driven by unmeasured factors other than nest type. In particular, for  
329 the MuSSE-3 model of nest evolution, we found that hole nesters had faster net  
330 diversification (defined as speciation minus extinction) than cup nesters, and the  
331 smallest net diversification was associated with dome nesters (Fig. 3a). This result was  
332 also true when the prior of extinction fraction was faster ( $a = \mu/\lambda = 0.8$ , Fig. 3a), or  
333 when the states were coded using the MuSSE-6 (Fig. 3a). This result also holds for all  
334 enhanced extinction fractions ( $0 \ll a = \mu/\lambda < 1$ ) (Fig. A1). When fitting the hidden  
335 state models MuHiSSE-3 and MuHiSSE-6 models (Fig. 3b), we found that the three-  
336 state posterior distributions of net diversification rates completely overlap within A and  
337 within B while being different between A and B, indicating that diversification rate

*Zenil-Ferguson, R.; McEntee, J.P.; Burleigh, J.G.; and Duckworth, R.A. - Nest type linked to diversification*

338 differences across the phylogenetic tree are due to hidden states (Fig. 3b). These  
339 results were consistent when we allowed MuHiSSE-3 to have an extinction fraction of at  
340 least 0.8 (Fig. 3b). Furthermore, when calculating Bayes factors comparing the CID-3  
341 (diversification rates independent of nest type) model against the MuSSE-3  
342 (diversification rates depend on nest type), we found that the CID-3 model is preferred  
343 over the MuSSE-3 ( $\kappa = -6033.72 - (-7772.40) = 1738.67 > 1$ ). Altogether, there is  
344 strong evidence that the heterogeneity observed in passerine diversification rates is not  
345 linked to nest type.

346

347 *Evolving out of holes is faster than evolving back into them*

348 Since nest type is not linked to the diversification process, we turn to understand the  
349 dynamics under the diversification-free Mk3 model. The posterior distribution of  
350 transition rates from the Mk3 model shows that the rate of transitioning from hole to cup  
351 was the fastest (mean  $q_{32} = 9.1 \times 10^{-3}$ , 95% credible interval  $(6.5 \times 10^{-3}, 0.01)$ ),  
352 followed by the transition from hole to dome (mean  $q_{31} = 6.5 \times 10^{-3}$ , 95% credible  
353 interval  $(3.7 \times 10^{-3}, 8.2 \times 10^{-3})$ , Fig. 4A). Transition rates from either dome or cup to hole  
354 nests were similar, and both were slower than the transition rates out of hole nests  
355 (dome to hole transition rates have a mean  $q_{13} = 1.6 \times 10^{-3}$ , and 95% credible interval  
356  $(6.6 \times 10^{-4}, 2.8 \times 10^{-3})$ ; cup to hole transition rates have a mean  $q_{23} = 1.2 \times 10^{-3}$ , credible  
357 interval  $(7.3 \times 10^{-4}, 2.5 \times 10^{-3})$ , shown in Fig. 4a. This pattern was also found in the Mk6  
358 model (Fig. 4b) which further revealed that transitioning from hole-nesting to use of two  
359 different nest types (DH or CH) is rare (Fig. 4b, credible intervals for these rates contain  
360 zero).



Zenil-Ferguson, R.; McEntee, J.P.; Burleigh, J.G.; and Duckworth, R.A. - Nest type linked to diversification

361

362

*Hole-nesting is the most probable state at the root*

363

The Mk3 model reconstructs hole-nesting as the state with the highest probability

364

at the most recent common ancestor of the Passeriformes we found that the maximum

365

*a posteriori* for the root's marginal posterior probability was 0.77 for hole-nesting when

366

the tree included the parrot *Strigops habroptila* as the outgroup. This probability

367

decreased to 0.51 when the tree only contained passerines and no outgroup (states

368

hole and cup make the other 0.49 of probability). The posterior distribution for the

369

stochastic vector at the root had as its maximum the vector (Dome=0.30, Cup=0.25,

370

Hole=0.45).

371

## DISCUSSION

372

Over the years, there have been diverse perspectives on the link between

373

ecological specialization and evolutionary diversification (Vamosi et al. 2014). On the

374

one hand, ecological specialization has been viewed as an evolutionary dead end

375

because it leads to evolutionary changes in traits that are difficult to reverse, which can

376

leave specialized taxa at higher risk of extinction when conditions change. On the other

377

hand, other studies have emphasized the links between specialization and increased

378

diversification (Losos et al. 1994; Schluter 2000) because a narrower niche could

379

increase diversification either directly, if niche shifts are associated with multiple

380

speciation events (Yoder et al. 2010), or indirectly, because of differences in dispersal,

381

connectivity, population persistence, and/or range size of specialist and generalist

382

species (Greenberg and Mooers 2017; Harvey et al. 2019). Testing the outcomes of

383

specialization on diversification rates has been difficult because macroevolutionary

*Zenil-Ferguson, R.; McEntee, J.P.; Burleigh, J.G.; and Duckworth, R.A. - Nest type linked to diversification*

384 models require datasets with a large number of independent origins of specialization  
385 (Day et al. 2016).

386         Here, using state-dependent diversification models in a large tree of passerines,  
387 we found that hole-nesting specialization does not differ from cup and dome-nesting in  
388 diversification rates. We also found that transition rates into hole-nesting were low  
389 compared to transitions out of hole-nesting (Fig. 4), and that the most probable state for  
390 the root of all passerines was hole-nesting. These three results highlight the lack of  
391 support for the hypothesis that specialization leads to an evolutionary dead end. Our  
392 results, combined with a number of recent studies addressing this hypothesis (Day et al.  
393 2016; Cyriac and Kodandaramaiah 2018), raise the question of whether the link  
394 between diversification rates and ecological specialization is truly variable across taxa  
395 and traits, or whether newer phylogenetic comparative methods and larger data sets are  
396 allowing us to test hypotheses more rigorously. Interestingly, in our study, which uses a  
397 large dataset with numerous transitions to the specialized hole-nesting state, we found  
398 that, in the absence of accounting for hidden states, adoption of hole-nesting behavior  
399 led to higher, not lower, diversification rates (Fig. 3a). However, when we included  
400 hidden states, and thus accounted for the possibility that other, unmeasured variables  
401 are driving the relationship, we found no difference in diversification rates across the  
402 three nesting types (Fig. 3b). This comparison emphasizes that phylogenetic studies of  
403 specialization that do not account for hidden states may need to reevaluate their null  
404 hypotheses of diversification. More generally, our results, in combination with recent  
405 tests of the evolutionary dead end hypothesis, suggest that there is growing evidence

*Zenil-Ferguson, R.; McEntee, J.P.; Burleigh, J.G.; and Duckworth, R.A. - Nest type linked to diversification*

406 that specialization rarely leads to an evolutionary dead end (Stern et al. 2017; Villastrigo  
407 et al. 2020).

408         The ecological consequences of specialization can be diverse – specialization  
409 can, in some cases, decrease competition for resources and, in other cases, increase it.  
410 For example, many studies have focused on diet or host specialization, which frequently  
411 reduce competition over food or breeding resources (Vamosi et al. 2014). However,  
412 specialization can also enable species to escape predation (e.g. Singer et al. 2019) and,  
413 in such cases, may actually increase competition for scarce, protective resources. Such  
414 is the case for hole-nesting birds, where an important consequence of hole-nesting is  
415 that it strongly reduces the risk of nest predation, an important driving force behind life  
416 history evolution in birds (Martin 1995). In our study, we were able to distinguish  
417 between the influence of ecological specialization *per se* versus one specific ecological  
418 consequence of specialization – reduced predation. Dome-nesting birds also show  
419 decreased predation rates (Oniki 1979; Linder and Bollinger 1995; Auer et al. 2007;  
420 Martin et al. 2017), but they are relatively unspecialized in nesting substrates compared  
421 to hole-nesters. However, neither hole-nesting nor dome-nesting were associated with  
422 elevated diversification rates. This suggests that, in passerine birds, reduced nest  
423 predation rates do not have a strong influence on diversification dynamics and, while  
424 escaping predation can often lead to ecological release (Herrmann et al. 2021), this  
425 does not necessarily translate into increased ecological opportunity or subsequent  
426 adaptive diversification. Moreover, reduced predation can also increase species' ability  
427 to persist and, hence, decrease extinction risk. Yet, a change in abundance of nesting  
428 holes, such as declines in tree cavities, has been shown to lead to heightened risk of

*Zenil-Ferguson, R.; McEntee, J.P.; Burleigh, J.G.; and Duckworth, R.A. - Nest type linked to diversification*

429 extinction (Duckworth and Badyaev 2007). Thus, the lack of a relationship with  
430 diversification rates may reflect a balance between these various ecological  
431 consequences of adopting hole-nesting.

432 Another factor that may account for inconsistency across studies in the links  
433 between specialization and macroevolutionary dynamics is the extent to which  
434 specialization results in further evolution of specific traits. Ecological specialization is a  
435 narrowing of an organism's niche, and so results from a change in how an organism  
436 interacts with its environment. Futuyma and Moreno (1988) point out that specialization,  
437 at a minimum, only requires a behavioral shift, and specialized taxa vary in the extent  
438 that there is subsequent evolution of other traits. Thus, it is possible that whether  
439 specialization is an evolutionary dead end or not may be strongly linked to the extent of  
440 secondary adaptation that follows it. In the case of hole-nesting birds, specialization is  
441 largely a behavioral shift, although it does lead to evolutionary changes in many life  
442 history and breeding traits (see below). Thus, it may be that hole-nesting specialization  
443 does not lead to an evolutionary dead end because of the relative ease of reversing  
444 these traits (Fig. 4). In the future, studies that explicitly compare multiple types of  
445 specialization with distinct ecological consequences and distinct influences on trait  
446 evolution would shed light on their relative importance for macroevolutionary dynamics.

447 The low rate of evolutionary transitions into, relative to out of, hole-nesting (Fig.  
448 4) provides further evidence against the evolutionary dead end hypothesis and instead  
449 suggests that evolving ecological specialization can be challenging. In the case of hole-  
450 nesters, becoming ecologically specialized involves facing increased interspecific  
451 competition, as holes are sought not only by other birds but also by other vertebrates

*Zenil-Ferguson, R.; McEntee, J.P.; Burleigh, J.G.; and Duckworth, R.A. - Nest type linked to diversification*

452 (Newton 1994). Thus, competition may prevent evolutionary transitions towards  
453 specialization. Evolutionary transitions from hole-nesting to open-cup nesting, which  
454 occur at a relatively high rate, involve different evolutionary challenges, such as life  
455 history specialization. Open-cup nesting species have exceptionally high nestling  
456 growth rates, which appear to be an adaptation to increased predation risk (Ricklefs  
457 1979). Moving from the relaxed selection regime on growth rates associated with hole-  
458 nesting to the strong selection regime on growth rates in open-cup nests would seem to  
459 act as a filter that would limit this transition. However, our results suggest that, at least  
460 in passerine birds, evolving such life history shifts is easier than evolving the ability to  
461 deal with the intense competition of hole-nesting.

462 We also found evidence that it was easier for birds to transition from hole to cup  
463 rather than hole to dome. Most hole nesters build an open-cup style nest, rather than a  
464 dome, within the cavity (Price and Griffith 2017). Our finding that transitions to open-cup  
465 nesting were easier compared to transitions to dome may simply reflect that transitions  
466 from hole-nesting occurred more often in taxa that were already building open-cup nests  
467 within their holes. Thus, for most hole nesters, transitioning to dome-nesting may be  
468 more difficult because it would require two steps: leaving cavities and changing how the  
469 nest is built. While in the minority, there are several clades, particularly at the base of  
470 the passerine tree, that build dome style nests within cavities (Price and Griffith 2017).  
471 Future studies comparing transitions to dome and open-cup nests based on whether  
472 hole-nesting species are already building a dome or cup style nest within their cavity  
473 would add further insight into the mechanisms behind these different transition rates.

474 *Ancestral State Reconstruction*

Zenil-Ferguson, R.; McEntee, J.P.; Burleigh, J.G.; and Duckworth, R.A. - Nest type linked to diversification

475           In all our ancestral state reconstructions we found that hole-nesting is the most  
476   probable state at the root of the passerines. When including the parrot *Strigops*  
477   *habroptilus* as the outgroup, the maximum of the marginal posterior distribution of the  
478   node had a probability of 0.77 for hole-nesting. Without this outgroup, we still recovered  
479   hole-nesting with a maximum a posteriori of 0.51 (see figure S12 in supplementary  
480   information). These two reconstructions represent significant evidence in favor of the  
481   specialized state hole-nesting at the origin of passerines. Previous work has  
482   emphasized that hole-nesting, dome-nesting, and open-cup nesting all appear to have  
483   occurred early in the history of passerines (Collias 1997; Price and Griffith 2017; Fang  
484   et al. 2018; McEntee et al. 2018), with Collias (1997) suggesting that the nest type of  
485   the earliest passerine might be unknowable because of the apparent rapid evolution of  
486   nest type in early passerines. Our ancestral state reconstruction, using an approach  
487   where we included strong species-level sampling and assessed whether differing  
488   diversification rates had to be accounted for (Maddison 2006), tips the balance in favor  
489   of hole-nesting as the ancestral state for the common ancestor of extant passerines.  
490   Notably, this result contrasts with the ancestral state reconstruction of (Fang et al.  
491   2018), which included more sampling outside of passerines and less species-level  
492   sampling within passerines. However, in our study, support for hole-nesting as the  
493   ancestral state serves to underscore how radically the evolution of hole-nesting as a  
494   specialization fails to meet the generalists-to-specialists view of evolution; rather than a  
495   dead end, all passerine diversity emerged from a specialist ancestor.

496

497

*Zenil-Ferguson, R.; McEntee, J.P.; Burleigh, J.G.; and Duckworth, R.A. - Nest type linked to diversification*

498 *Modeling the diversification consequences of specialization*

499 State-dependent diversification models are a flexible tool to test whether  
500 specialization is linked to diversification rates. A recent ongoing discussion in the field of  
501 macroevolution centers on the impossibility of estimating speciation and extinction rates  
502 from phylogenetic trees with only extant taxa using birth and death stochastic models  
503 with time-dependent parameters (Louca and Pennell 2020). The non-identifiability of  
504 parameters in the time-dependent diversification models, and the possibility of multiple  
505 congruent likelihoods across time-dependent models may affect the state-dependent  
506 diversification models presented here. State-dependent diversification models are  
507 simply a special case of the time-dependent models explored in Louca and Pennell  
508 (2020). However, taking into consideration the nest type and using informative priors to  
509 represent different extinction scenarios show the potential for recovering the direction of  
510 differences between states, even if point estimates for speciation and extinction rates  
511 are not the same across these scenarios (Fig. 4, and Fig. A1), as suggested by Louca  
512 and Pennell (2020). Our main findings under the assumptions of enhanced extinction  
513 suggest that the relative differences among states are possible to infer despite the non-  
514 identifiability between different extinction histories. Therefore, it is important when  
515 applying state-dependent diversification models to clarify whether the goal is to obtain  
516 point estimates for speciation or extinction rates, or to find relative differences in the  
517 history of diversification linked to the states. In this study, we were interested in the  
518 latter, and our results suggest that finding relative differences of diversification between  
519 states can be performed in a systematic fashion with consistent results.

*Zenil-Ferguson, R.; McEntee, J.P.; Burleigh, J.G.; and Duckworth, R.A. - Nest type linked to diversification*

520 Overall, we were able to rigorously test different hypotheses and extinction  
521 scenarios because of the size of the tree, the number of transitions between nest types,  
522 and the large proportion of passerines in the sample (> 51%). Studies of specialization  
523 linked to diversification might conclude spurious associations of specialization and  
524 diversification when independent transitions to and from the specialized state are too  
525 few (Uyeda et al. 2018), tree size is not large enough (Davis et al. 2013), and sampling  
526 fraction is small (Chang et al. 2020). Historically, standards for the quality rather than  
527 the quantity of the sample needed to fit SSE models have been lacking, so it is  
528 important that future studies of state-dependent diversification be aware of these issues.

#### 529 CONCLUSIONS

530 Our macroevolutionary analysis failed to find any link between specialization of  
531 nest type and diversification rates under different extinction scenarios, suggesting that  
532 there is little support for the evolutionary dead end hypothesis in this case study.  
533 Moreover, contrary to this hypothesis, we also found that transitions from the  
534 specialized state were relatively easy compared to transitions toward the more  
535 generalist states and that the root state of passerines is most probably hole-nesting.  
536 Our results suggest that the ecological consequences of resource specialization,  
537 whether due to escape from competition or predation, might be key to understanding its  
538 macroevolutionary consequences. This work adds to other recent studies that have  
539 found little support for the evolutionary dead end idea, suggesting that evolution of  
540 resource specialization is more evolutionarily labile than previously thought. We suggest  
541 that future studies of this question would benefit from explicit comparison of resource  
542 specialization that vary in their ecological consequences, as well as the extent of trait



*Zenil-Ferguson, R.; McEntee, J.P.; Burleigh, J.G.; and Duckworth, R.A. - Nest type linked to diversification*

543 evolution necessary for specialization. Such studies would enable a greater  
544 understanding of the mechanisms that underlie variable links between specialization  
545 and macroevolutionary dynamics.  
546

*Zenil-Ferguson, R.; McEntee, J.P.; Burleigh, J.G.; and Duckworth, R.A. - Nest type linked to diversification*

547

LITERATURE CITED

- 548 Alhajeri B.H., Stepan S.J. 2018. Ecological and ecomorphological specialization  
549 are not associated with diversification rates in muroid rodents (Rodentia:  
550 Muroidea). *Evol. Biol.* 45:268–286.
- 551 Auer S.K., Bassar R.D., Joseph J., Martin T.E. 2007. Breeding biology of  
552 passerines in a subtropical montane forest in Northwestern Argentina. *Condor.*  
553 109:321–333.
- 554 Baiser B., Valle D., Zelazny Z., Gordon Burleigh J. 2018. Non-random patterns of  
555 invasion and extinction reduce phylogenetic diversity in island bird assemblages.  
556 *Ecography.* 41:361–374.
- 557 Beaulieu J.M., O’Meara B.C. 2016. Detecting Hidden Diversification Shifts in  
558 Models of Trait-Dependent Speciation and Extinction. *Syst. Biol.* 65:583–601.
- 559 Bernays E.A. 1989. Host range in phytophagous insects: the potential role of  
560 generalist predators. *Evol. Ecol.* 3:299–311.
- 561 Birand A., Vose A., Gavrilets S. 2012. Patterns of species ranges, speciation, and  
562 extinction. *Am. Nat.* 179:1–21.
- 563 Bochenski Z.M., Tomek T., Bujoczek M., Salwa G. 2021. A new passeriform (Aves:  
564 Passeriformes) from the early Oligocene of Poland sheds light on the beginnings of  
565 Suboscines. *J. Ornithol.*
- 566 Burleigh J.G., Kimball R.T., Braun E.L. 2015. Building the avian tree of life using a  
567 large-scale, sparse supermatrix. *Mol. Phylogenet. Evol.* 84:53–63.
- 568 Caetano D.S., O’Meara B.C., Beaulieu J.M. 2018. Hidden state models improve  
569 state-dependent diversification approaches, including biogeographical models.  
570 *Evolution.* 72:2308–2324.
- 571 Chang J., Rabosky D.L., Alfaro M.E. 2020. Estimating Diversification Rates on  
572 Incompletely Sampled Phylogenies: Theoretical Concerns and Practical Solutions.  
573 *Syst. Biol.* 69:602–611.
- 574 Cockle K.L., Martin K., Wesółowski T. 2011. Woodpeckers, decay, and the future of  
575 cavity-nesting vertebrate communities worldwide. *Front. Ecol. Environ.* 9:377–382.
- 576 Collias N.E. 1997. On the origin and evolution of nest building by passerine birds.  
577 *Condor.* 99:253–270.
- 578 Collias N.E., Collias E.C. 1984. Nest building and bird behavior. Princeton  
579 University Press.

*Zenil-Ferguson, R.; McEntee, J.P.; Burleigh, J.G.; and Duckworth, R.A. - Nest type linked to diversification*

- 580 Conway M., Olsen B.J. 2019. Contrasting drivers of diversification rates on islands  
581 and continents across three passerine families. *Proc. Biol. Sci.* 286:20191757.
- 582 Crouch N.M.A., Ricklefs R.E. 2019. Speciation Rate Is Independent of the Rate of  
583 Evolution of Morphological Size, Shape, and Absolute Morphological Specialization  
584 in a Large Clade of Birds. *Am. Nat.* 193:E78–E91.
- 585 Cyriac V.P., Kodandaramaiah U. 2018. Digging their own macroevolutionary grave:  
586 fossoriality as an evolutionary dead end in snakes. *J. Evol. Biol.* 31:587–598.
- 587 Davis M.P., Midford P.E., Maddison W. 2013. Exploring power and parameter  
588 estimation of the BiSSE method for analyzing species diversification. *BMC Evol.*  
589 *Biol.* 13:38.
- 590 Day E.H., Hua X., Bromham L. 2016. Is specialization an evolutionary dead end?  
591 Testing for differences in speciation, extinction and trait transition rates across  
592 diverse phylogenies of specialists and generalists. *J. Evol. Biol.* 29:1257–1267.
- 593 Del Hoyo J., Elliott A., Sargatal J., Christie D.A., de Juana E. 2017. Handbook of  
594 the birds of the world alive. Lynx Edicions, Barcelona, Spain.
- 595 Duckworth R.A., Badyaev A.V. 2007. Coupling of dispersal and aggression  
596 facilitates the rapid range expansion of a passerine bird. *Proc. Natl. Acad. Sci. U.*  
597 *S. A.* 104:15017–15022.
- 598 Fang Y.-T., Tuanmu M.-N., Hung C.-M. 2018. Asynchronous evolution of  
599 interdependent nest characters across the avian phylogeny. *Nat. Commun.* 9:1863.
- 600 Freyman W.A., Höhna S. 2018. Cladogenetic and Anagenetic Models of  
601 Chromosome Number Evolution: A Bayesian Model Averaging Approach. *Syst.*  
602 *Biol.* 67:195–215.
- 603 Futuyma D.J., Moreno G. 1988. The evolution of ecological specialization. *Annu.*  
604 *Rev. Ecol. Syst.* 19:207–233.
- 605 Gavrilets S., Li H., Vose M.D. 2000. Patterns of parapatric speciation. *Evolution.*  
606 54:1126–1134.
- 607 Greenberg D.A., Mooers A.Ø. 2017. Linking speciation to extinction: Diversification  
608 raises contemporary extinction risk in amphibians. *Evolution Letters.* 1:40–48.
- 609 Harvey M.G., Singhal S., Rabosky D.L. 2019. Beyond Reproductive Isolation:  
610 Demographic Controls on the Speciation Process. *Annual Review of Ecology,*  
611 *Evolution, and Systematics.* 50:75–95.
- 612 Hastings W.K. 1970. Monte Carlo sampling methods using Markov chains and their  
613 applications. *Biometrika.* 57:97–109.

*Zenil-Ferguson, R.; McEntee, J.P.; Burleigh, J.G.; and Duckworth, R.A. - Nest type linked to diversification*

- 614 Herrmann N.C., Stroud J.T., Losos J.B. 2021. The evolution of “ecological release”  
615 into the 21st century. *Trends Ecol. Evol.* 36:206–215.
- 616 Hieronymus T.L., Waugh D.A., Clarke J.A. 2019. A new zygodactylid species  
617 indicates the persistence of stem passerines into the early Oligocene in North  
618 America. *BMC Evol. Biol.* 19:3.
- 619 Höhna S., Landis M.J., Heath T.A., Boussau B., Lartillot N., Moore B.R.,  
620 Huelsenbeck J.P., Ronquist F. 2016. RevBayes: Bayesian Phylogenetic Inference  
621 Using Graphical Models and an Interactive Model-Specification Language. *Syst.*  
622 *Biol.* 65:726–736.
- 623 Höhna S., Stadler T., Ronquist F., Britton T. 2011. Inferring speciation and  
624 extinction rates under different sampling schemes. *Mol. Biol. Evol.* 28:2577–2589.
- 625 Jetz W., Thomas G.H., Joy J.B., Hartmann K., Mooers A.O. 2012. The global  
626 diversity of birds in space and time. *Nature.* 491:444–448.
- 627 Jordan M.I. 2004. Graphical Models. *SSO Schweiz. Monatsschr. Zahnheilkd.*  
628 19:140–155.
- 629 Kass R.E., Raftery A.E. 1995. Bayes Factors. *J. Am. Stat. Assoc.* 90:773–795.
- 630 Kilner R.M. 2006. The evolution of egg colour and patterning in birds. *Biol. Rev.*  
631 *Camb. Philos. Soc.* 81:383–406.
- 632 Ksepka D.T., Grande L., Mayr G. 2019. Oldest Finch-Beaked Birds Reveal Parallel  
633 Ecological Radiations in the Earliest Evolution of Passerines. *Curr. Biol.* 29:657–  
634 663.e1.
- 635 Linder E.T., Bollinger E.K. 1995. Depredation of artificial Ovenbird nests in a forest  
636 patch. *Wilson Bull.* 107:169–174.
- 637 Losos J.B., Irschick D.J., Schoener T.W. 1994. ADAPTATION AND CONSTRAINT  
638 IN THE EVOLUTION OF SPECIALIZATION OF BAHAMIAN ANOLIS LIZARDS.  
639 *Evolution.* 48:1786–1798.
- 640 Louca S., Pennell M.W. 2020. Extant timetrees are consistent with a myriad of  
641 diversification histories. *Nature.* 580:502–505.
- 642 Louca S., Pennell M.W. 2021. Why extinction estimates from extant phylogenies  
643 are so often zero. *bioRxiv.*:2021.01.04.425256.
- 644 Maddison W.P. 2006. Confounding asymmetries in evolutionary diversification and  
645 character change. *Evolution.* 60:1743–1746.
- 646 Manegold A. 2008. Passerine diversity in the late Oligocene of Germany: earliest  
647 evidence for the sympatric coexistence of Suboscines and Oscines. *Ibis* . 150:377–

*Zenil-Ferguson, R.; McEntee, J.P.; Burleigh, J.G.; and Duckworth, R.A. - Nest type linked to diversification*

- 648 387.
- 649 Marshall C.R. 2017. Five palaeobiological laws needed to understand the evolution  
650 of the living biota. *Nature ecology & evolution*. 1:165.
- 651 Martin T.E. 1993. Nest predation and nest sites. *Bioscience*. 43:523.
- 652 Martin T.E. 1995. Avian life history evolution in relation to nest sites, nest predation,  
653 and food. *Ecol. Monogr*. 65:101–127.
- 654 Martin T.E., Boyce A.J., Fierro-Calderón K., Mitchell A.E., Armstad C.E., Mouton  
655 J.C., Bin Soudi E.E. 2017. Enclosed nests may provide greater thermal than nest  
656 predation benefits compared with open nests across latitudes. *Funct. Ecol*.  
657 31:1231–1240.
- 658 Martin T.E., Li P. 1992. Life History Traits of Open- vs. Cavity-Nesting Birds.  
659 *Ecology*. 73:579–592.
- 660 McEntee J.P., Zelazny Z., Burleigh J.G. 2018. The macroecology of passerine nest  
661 types, in the light of macroevolution. *bioRxiv*.
- 662 Metropolis N., Rosenbluth A.W., Rosenbluth M.N., Teller A.H., Teller E. 1953.  
663 Equation of State Calculations by Fast Computing Machines. *J. Chem. Phys*.  
664 21:1087–1092.
- 665 Newton I. 1994. The role of nest sites in limiting the numbers of hole-nesting birds:  
666 a review. *Biol. Conserv*. 70:265–276.
- 667 Nice M.M. 1957. Nesting success in altricial birds. *Auk*. 74:305–321.
- 668 Oniki Y. 1979. Is nesting success of birds low in the tropics? *Ornithol. Monogr*.  
669 11:60–69.
- 670 Oswald J.A., Steadman D.W. 2018. The late Quaternary bird community of New  
671 Providence, Bahamas. *The Auk: Ornithological Advances*. 135:359–377.
- 672 Otero A., Jiménez-Mejías P., Valcárcel V., Vargas P. 2019. Being in the right place  
673 at the right time? Parallel diversification bursts favored by the persistence of  
674 ancient epizoochorous traits and hidden factors in Cynoglossoideae. *Am. J. Bot*.  
675 106:438–452.
- 676 Paradis E., Schliep K. 2019. ape 5.0: an environment for modern phylogenetics and  
677 evolutionary analyses in R. *Bioinformatics*. 35:526–528.
- 678 Price J.J., Griffith S.C. 2017. Open cup nests evolved from roofed nests in the early  
679 passerines. *Proc. Biol. Sci*. 284:20162708.
- 680

*Zenil-Ferguson, R.; McEntee, J.P.; Burleigh, J.G.; and Duckworth, R.A. - Nest type linked to diversification*

- 681 Rabosky D.L., Goldberg E.E. 2015. Model inadequacy and mistaken inferences of  
682 trait-dependent speciation. *Syst. Biol.* 64:340–355.
- 683 Rabosky D.L., Goldberg E.E. 2017. FiSSE: A simple nonparametric test for the  
684 effects of a binary character on lineage diversification rates. *Evolution.* 71:1432–  
685 1442.
- 686 Rambaut A., Drummond A.J., Xie D., Baele G., Suchard M.A. 2018. Posterior  
687 Summarization in Bayesian Phylogenetics Using Tracer 1.7. *Syst. Biol.* 67:901–  
688 904.
- 689 Ricklefs R.E. 1969. An analysis of nesting mortality in birds. *Smithson. Contrib.*  
690 *Zool.* 9:1–48.
- 691 Ricklefs R.E. 1979. Adaptation, constraint, and compromise in avian postnatal  
692 development. *Biol. Rev. Camb. Philos. Soc.* 54:269–290.
- 693 Sanderson M.J. 2003. r8s: inferring absolute rates of molecular evolution and  
694 divergence times in the absence of a molecular clock. *Bioinformatics.* 19:301–302.
- 695 Schluter D. 2000. *The Ecology of Adaptive Radiation.* Oxford, UK: Oxford  
696 University Press.
- 697 Sexton J.P., Montiel J., Shay J.E., Stephens M.R., Slatyer R.A. 2017. Evolution of  
698 Ecological Niche Breadth. *Annu. Rev. Ecol. Evol. Syst.* 48:183–206.
- 699 Singer M.S., Clark R.E., Johnson E.R., Lichter-Marck I.H., Mooney K.A., Whitney  
700 K.D. 2019. Dietary specialization is conditionally associated with increased ant  
701 predation risk in a temperate forest caterpillar community. *Ecol. Evol.* 9:12099–  
702 12112.
- 703 Stadler T. 2013. How can we improve accuracy of macroevolutionary rate  
704 estimates? *Syst. Biol.* 62:321–329.
- 705 Steadman D.W., Oswald J.A., Rincón A.D. 2015. The diversity and biogeography of  
706 late Pleistocene birds from the lowland Neotropics. *Quat. Res.* 83:555–564.
- 707 Stern D.B., Breinholt J., Pedraza-Lara C., López-Mejía M., Owen C.L., Bracken-  
708 Grissom H., Fetzner J.W. Jr, Crandall K.A. 2017. Phylogenetic evidence from  
709 freshwater crayfishes that cave adaptation is not an evolutionary dead-end.  
710 *Evolution.* 71:2522–2532.
- 711 Tonini J.F.R., Ferreira R.B., Pyron R.A. 2020. Specialized breeding in plants affects  
712 diversification trajectories in Neotropical frogs. *Evolution.* 74:1815–1825.
- 713 Uyeda J.C., Zenil-Ferguson R., Pennell M.W. 2018. Rethinking phylogenetic  
714 comparative methods. *Syst. Biol.* 67:1091–1109.

*Zenil-Ferguson, R.; McEntee, J.P.; Burleigh, J.G.; and Duckworth, R.A. - Nest type linked to diversification*

- 715 Vamosi J.C., Armbruster W.S., Renner S.S. 2014. Evolutionary ecology of  
716 specialization: insights from phylogenetic analysis. *Proc. Biol. Sci.* 281:20142004.
- 717 Villastrigo A., Abellán P., Ribera I. 2021. Habitat preference and diversification  
718 rates in a speciose lineage of diving beetles. *Mol. Phylogenet. Evol.* 159:107087.
- 719 Villastrigo A., Arribas P., Ribera I. 2020. Irreversible habitat specialization does not  
720 constrain diversification in hypersaline water beetles. *Mol. Ecol.* 29:3637–3648.
- 721 Wallace A.R. 1868. A theory of birds' nests: showing the relation of certain sexual  
722 differences of colour in birds to their mode of nidification. *Journal of Travel and*  
723 *Natural History.* 1:73–89.
- 724 Xie W., Lewis P.O., Fan Y., Kuo L., Chen M.-H. 2011. Improving marginal likelihood  
725 estimation for Bayesian phylogenetic model selection. *Syst. Biol.* 60:150–160.
- 726 Yoder J.B., Clancey E., Des Roches S., Eastman J.M., Gentry L., Godsoe W.,  
727 Hagey T.J., Jochimsen D., Oswald B.P., Robertson J., Sarver B.A.J., Schenk J.J.,  
728 Spear S.F., Harmon L.J. 2010. Ecological opportunity and the origin of adaptive  
729 radiations. *J. Evol. Biol.* 23:1581–1596.
- 730 Zenil-Ferguson R., Burleigh J.G., Freyman W.A., Igić B., Mayrose I., Goldberg E.E.  
731 2019. Interaction among ploidy, breeding system and lineage diversification. *New*  
732 *Phytol.* 224:1252–1265.
- 733

Zenil-Ferguson, R.; McEntee, J.P.; Burleigh, J.G.; and Duckworth, R.A. - Nest type linked to diversification

734

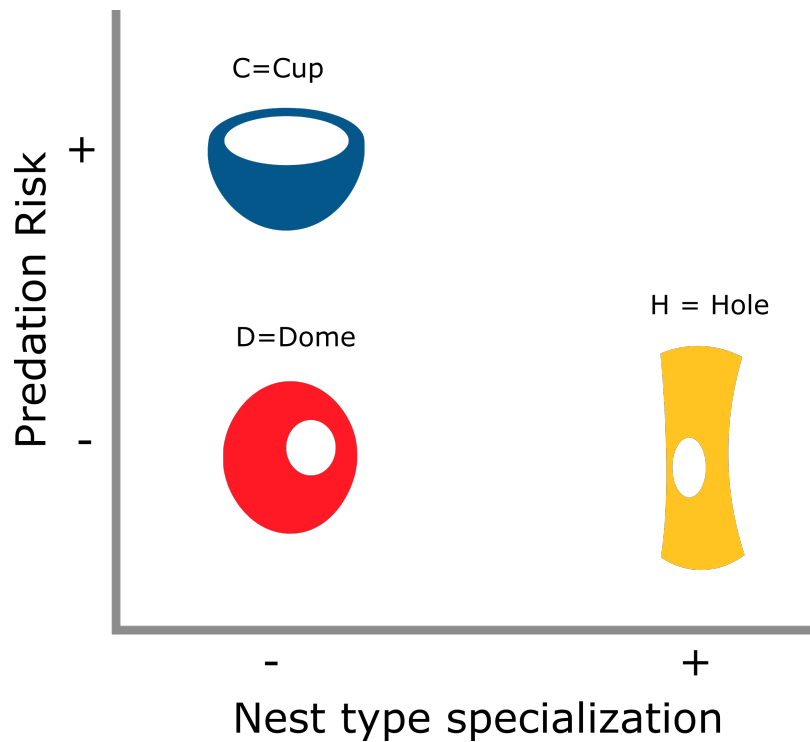

735

736 **Figure 1.** Nesting habits of passerine taxa can be organized based on a trade-off  
737 between specialization and predation risk. The most specialized nest type is hole that  
738 has the smallest predation risk, followed by dome with also a lower risk but relatively  
739 unspecialized in its nesting substrate. Finally, open-cups have the highest predation risk  
740 but are also considered unspecialized.



Zenil-Ferguson, R.; McEntee, J.P.; Burleigh, J.G.; and Duckworth, R.A. - Nest type linked to diversification

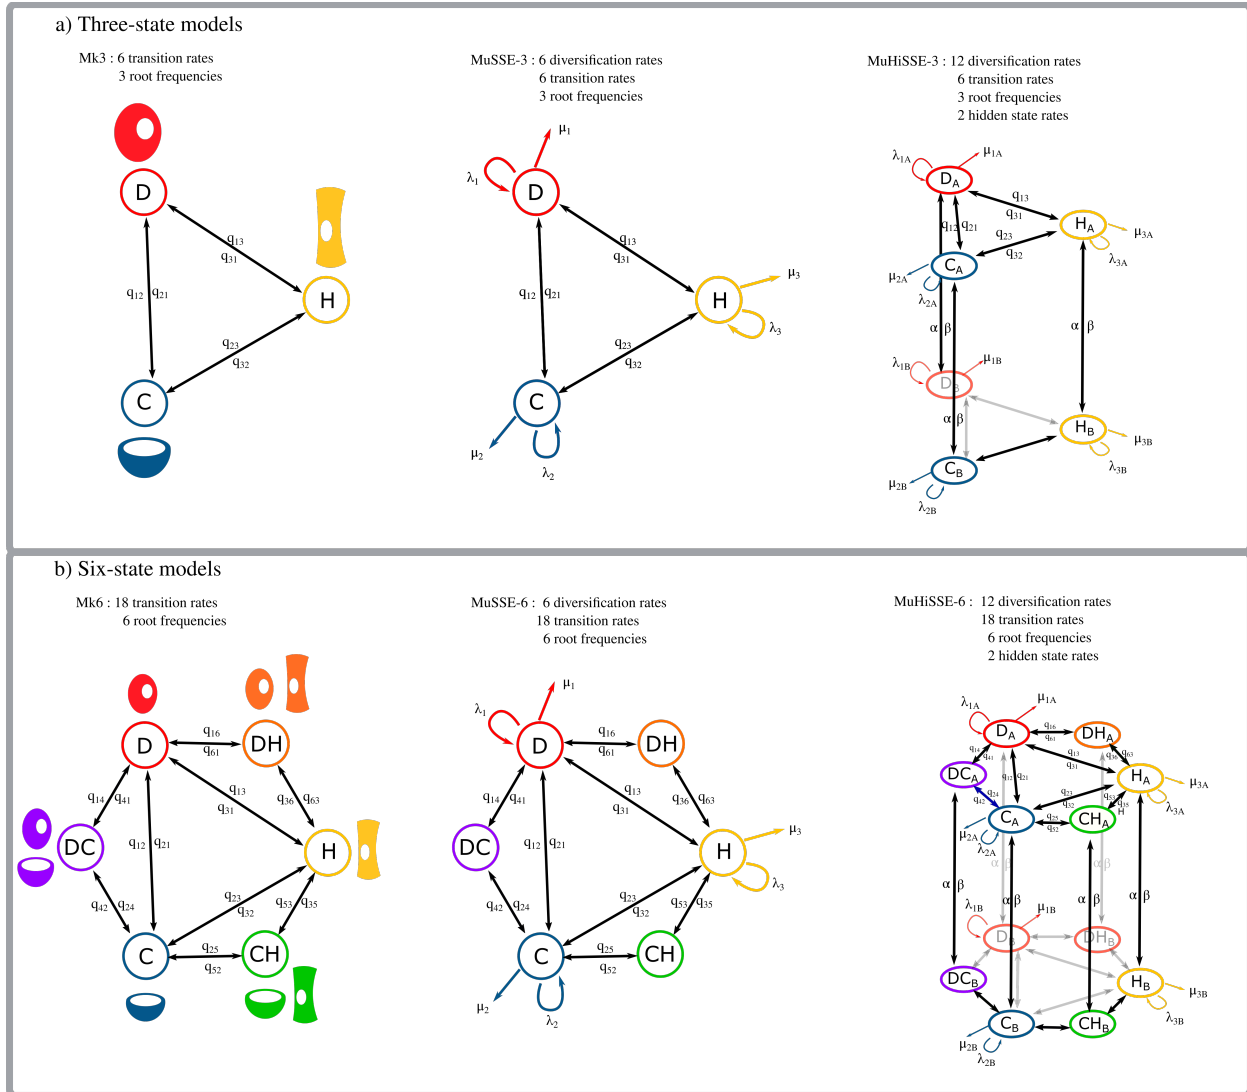

741

742 **Figure 2.** Models of nest type evolution. In panel a) three models are depicted: Mk3  
 743 which assumes all possible pairwise transitions for three types of nest (dome (*D*), cup  
 744 (*C*), and hole (*H*)); MuSSE-3 which assumes the same transitions but adds  
 745 diversification parameters to each of the states, and MuHiSSE-3 that adds the  
 746 possibility of heterogeneity in the diversification process different from the diversification  
 747 attributable to the state. In panel b) similar models to the ones found in panel (a) are  
 748 defined with three states that represent nest type (*D*, *C*, *H*) with the addition of three

Zenil-Ferguson, R.; McEntee, J.P.; Burleigh, J.G.; and Duckworth, R.A. - Nest type linked to diversification

749 more states that characterize those species with two nest types (dome-cup(DC), dome-  
 750 hole (DH), cup-hole (CH)).

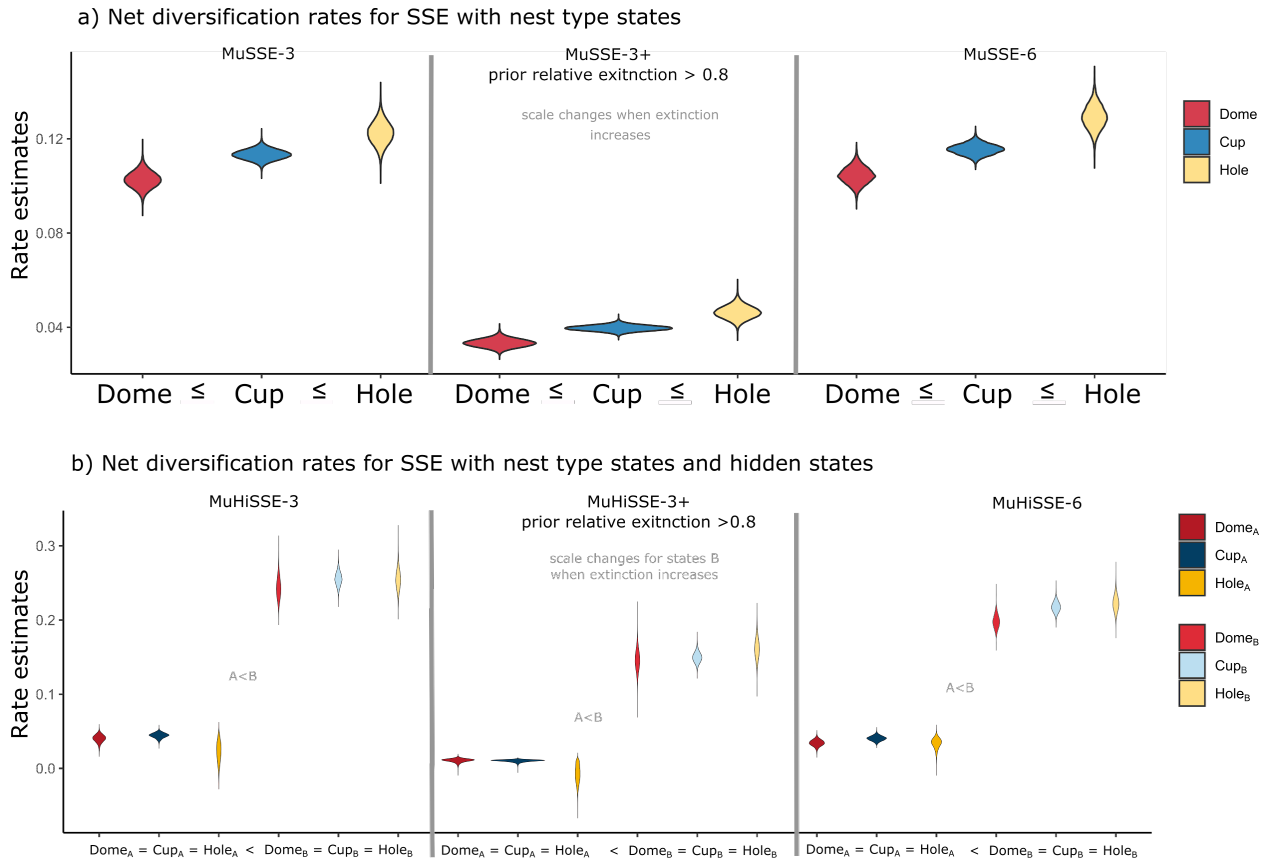

751  
 752 **Figure 3.** Net diversification rate estimates (speciation and extinction) for a) multistate  
 753 dependent diversification models (MuSSE), and b) multistate and hidden state  
 754 dependent diversification models (MuHiSSE). In models in (a) we consistently estimated  
 755 that hole nesters have faster net diversification rates than dome nesters, and that cup  
 756 nesters had intermediate rate estimates. This finding was consistent when we assumed  
 757 the extinction fraction to be at least 0.8 (MuSSE-3 model + prior extinction fraction >  
 758 0.8), or adding more intermediate states (MuSSE-6 model). The most noticeable  
 759 change is that increasing the extinction fraction (MuSSE-3 model+ extinction fraction >

*Zenil-Ferguson, R.; McEntee, J.P.; Burleigh, J.G.; and Duckworth, R.A. - Nest type linked to diversification*

760 0.8) decreases net diversification estimates (y-axis), but the relative differences  
761 between states are maintained. For models in (b) we observe that all diversification  
762 differences are due to the differences in hidden state (A<B) rather than nest type  
763 (Dome=Cup=Hole for A and B states), which is strong evidence against the direct  
764 influence of nest type on the speciation and extinction of passerines. Even increasing  
765 the extinction fraction (MuHiSSE-3 + prior extinction fraction > 0.8) or adding more  
766 intermediate states (MuHiSSE-6) yields the same results.  
767

Zenil-Ferguson, R.; McEntee, J.P.; Burleigh, J.G.; and Duckworth, R.A. - Nest type linked to diversification

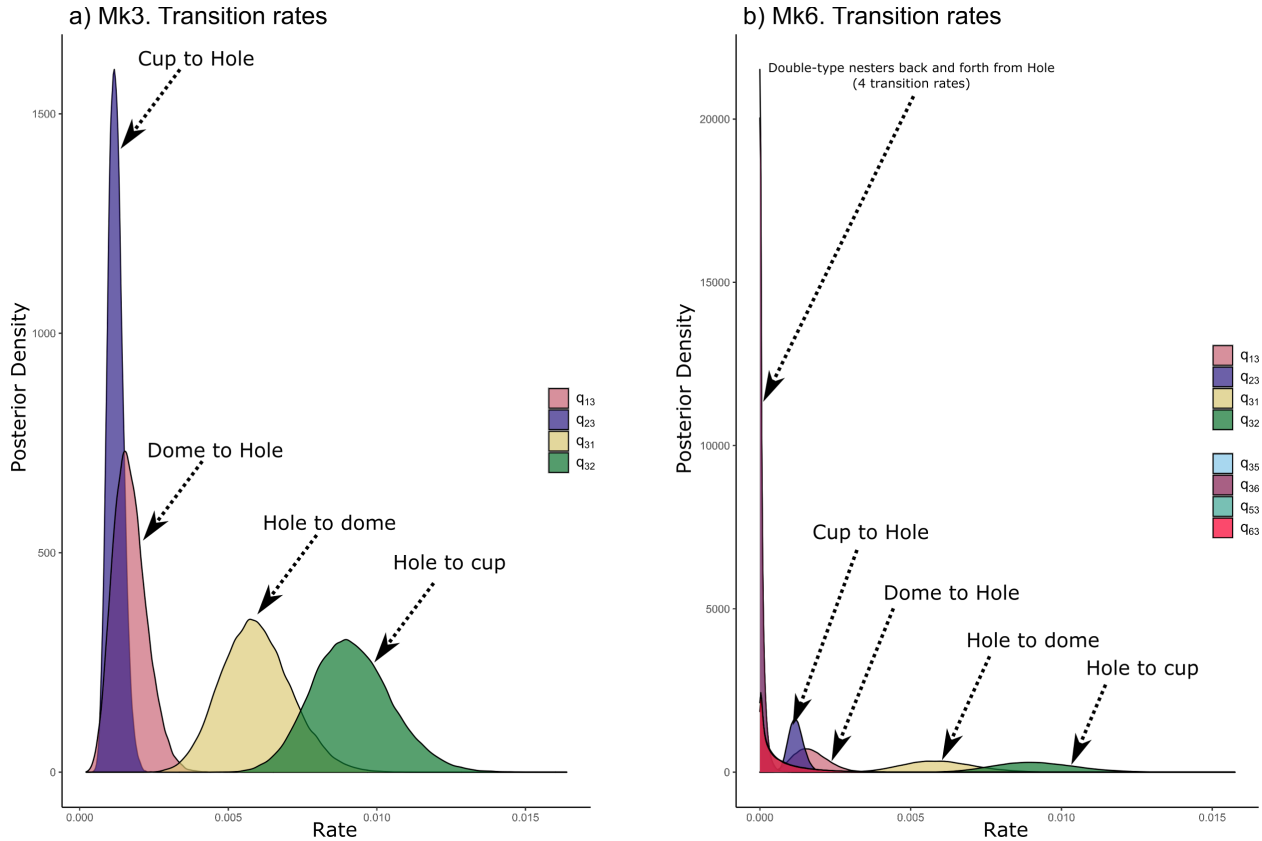

768

769

770

771

772

773

774

775

776

777

778

779

780

**Figure 4.** Transition rates between nest states for diversification-free models. In a) the model with three states (Mk3), the posterior distribution for the rate from hole to cup ( $q_{32}$ ) is faster than any other rate to and from hole. For b) the model with six-states (Mk6), in which states with two nest types are included, we found that evolving out of hole is faster than into hole, with hole to cup faster than hole to dome. Transitions back to hole from cup or dome are less frequent, and evolving back and forth between states CH or DH to hole has the slowest rates (four rates overlap).

Zenil-Ferguson, R.; McEntee, J.P.; Burleigh, J.G.; and Duckworth, R.A. - Nest type linked to diversification

781

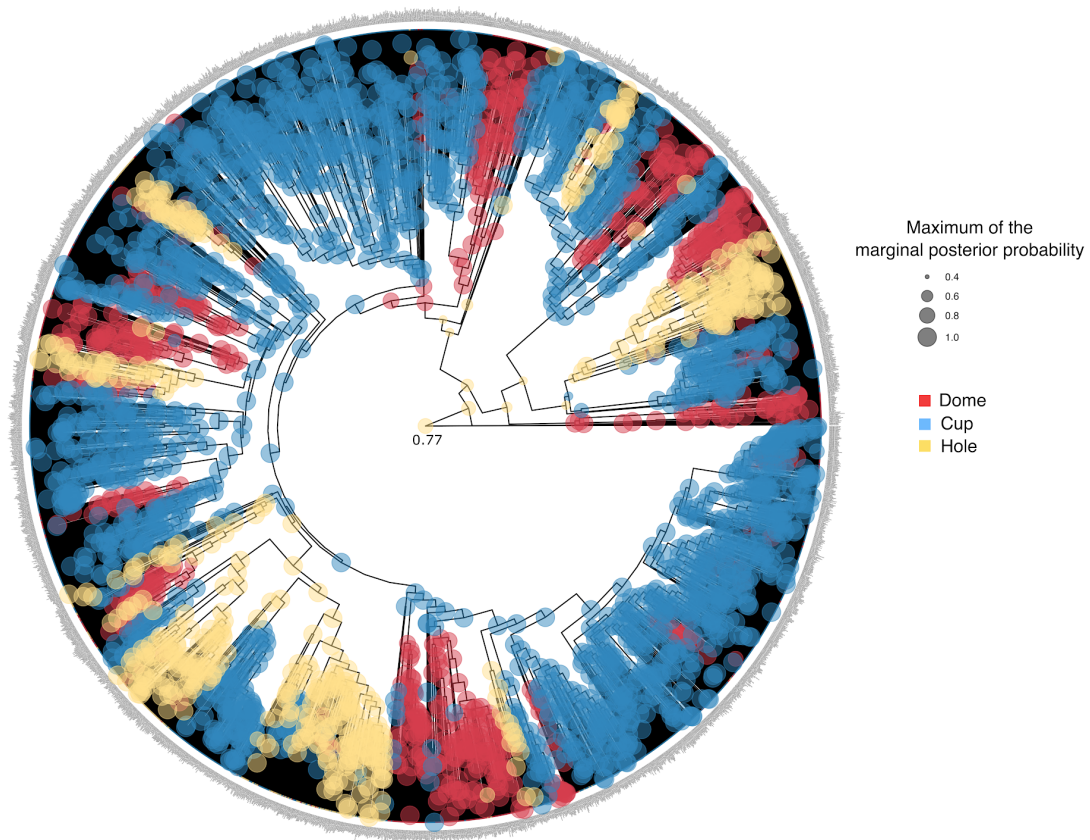

782 **Figure 5.** Ancestral state reconstruction for nest type using a Markov model with three  
783 states (Mk3). The size of a node represents the maximum probability value of the  
784 marginal posterior distribution of the node. The color of the node represents the nest  
785 type associated with the maximum posterior probability. This tree includes the hole-  
786 nesting *Strigops habroptila* as the outgroup.

| <b>Table A1.</b> Assumptions of extinction in different MuSSE-3 models.                                                                                                                                                                                                                                                                                                                                                                         |                                                                                                       |                                                                                                            |                                                                                                                                       |
|-------------------------------------------------------------------------------------------------------------------------------------------------------------------------------------------------------------------------------------------------------------------------------------------------------------------------------------------------------------------------------------------------------------------------------------------------|-------------------------------------------------------------------------------------------------------|------------------------------------------------------------------------------------------------------------|---------------------------------------------------------------------------------------------------------------------------------------|
| <b>Assumption<br/>Extinction fraction</b>                                                                                                                                                                                                                                                                                                                                                                                                       | <b>Extinction as a<br/>function of<br/>speciation</b>                                                 | <b>Prior distributions<br/>used*</b>                                                                       | <b>Interpretation</b>                                                                                                                 |
| 1. NA                                                                                                                                                                                                                                                                                                                                                                                                                                           | NA                                                                                                    | $\lambda_i \sim \text{LogN}(\mu_\lambda, \sigma_\lambda)$<br>$\mu_i \sim \text{LogN}(\mu_\mu, \sigma_\mu)$ | Speciation and extinction freely estimated                                                                                            |
| 2. $\mu_i/\lambda_i \geq 0.7$<br>with $i = C, D, H$                                                                                                                                                                                                                                                                                                                                                                                             | $\mu_i = 0.7\lambda_i + \delta$                                                                       | $\lambda_i \sim \text{LogN}(\mu_\lambda, \sigma_\lambda)$<br>$\delta \sim \text{Exp}(2)$<br>$i = C, D, H$  | Extinction rate is at least 0.7 of speciation rate                                                                                    |
| 3. $\mu_i/\lambda_i \geq 0.8$<br>with $i = C, D, H$                                                                                                                                                                                                                                                                                                                                                                                             | $\mu_i = 0.8\lambda_i + \delta$                                                                       | $\lambda_i \sim \text{LogN}(\mu_\lambda, \sigma_\lambda)$<br>$\delta \sim \text{Exp}(2)$<br>$i = C, D, H$  | Extinction rate is at least 0.8 of speciation rate                                                                                    |
| 4. $\mu_i/\lambda_i \geq 0.9$<br>with $i = C, D, H$                                                                                                                                                                                                                                                                                                                                                                                             | $\mu_i = 0.9\lambda_i + \delta$                                                                       | $\lambda_i \sim \text{LogN}(\mu_\lambda, \sigma_\lambda)$<br>$\delta \sim \text{Exp}(2)$<br>$i = C, D, H$  | Extinction rate is at least 0.9 of speciation rate                                                                                    |
| 5. $\mu_i/\lambda_i \geq 1.0$<br>with $i = C, D, H$                                                                                                                                                                                                                                                                                                                                                                                             | $\mu_i = \lambda_i + \delta$                                                                          | $\lambda_i \sim \text{LogN}(\mu_\lambda, \sigma_\lambda)$<br>$\delta \sim \text{Exp}(2)$<br>$i = C, D, H$  | Extinction rate is greater or equal to speciation rate                                                                                |
| 6. $\mu_i/\lambda_i \geq 1.1$<br>with $i = C, D, H$                                                                                                                                                                                                                                                                                                                                                                                             | $\mu_i = 1.1\lambda_i + \delta$                                                                       | $\lambda_i \sim \text{LogN}(\mu_\lambda, \sigma_\lambda)$<br>$\delta \sim \text{Exp}(2)$<br>$i = C, D, H$  | Extinction rate is at least 1.1 of speciation rate                                                                                    |
| 7. $\mu_C/\lambda_C \geq 0.8$<br>$\mu_D/\lambda_D \geq 0.7$<br>$\mu_H/\lambda_H \geq 0.6$                                                                                                                                                                                                                                                                                                                                                       | $\mu_C = 0.8\lambda_C + \delta$<br>$\mu_D = 0.7\lambda_D + \delta$<br>$\mu_H = 0.6\lambda_H + \delta$ | $\lambda_i \sim \text{LogN}(\mu_\lambda, \sigma_\lambda)$<br>$\delta \sim \text{Exp}(2)$<br>$i = C, D, H$  | For cup, extinction rate is at least 0.8, for dome, is at least 0.7, and for hole, extinction rate is at least 0.6 of speciation rate |
| *For prior distributions of the models we used a log-Normal distribution for speciation ( $\lambda$ ) with a mean parameter $\mu_\lambda$ equal to the total number of lineages 3225 divided by 2, and standard deviation $\sigma_\lambda$ of approximately 2. For the extra parameter ( $\delta$ ) we chose to model it using an exponential with rate 2. Other distributions were tested for that extra parameter and results were unaltered. |                                                                                                       |                                                                                                            |                                                                                                                                       |

*Zenil-Ferguson, R.; McEntee, J.P.; Burleigh, J.G.; and Duckworth, R.A. - Nest type linked to diversification*

789 In figure A1 we summarize the results of assumptions 1-6 from table A1. Here we can  
790 observe that when it is assumed that the extinction fraction is greater than 0.7 but less  
791 than 1, we recover the differences between states (Dome<Cup<Hole). When the  
792 extinction fraction is at least 1 and the extinction rate is expected to be about as large  
793 as speciation, then we found no differences in the posterior distributions of the three  
794 states. Finally, when the extinction rate is assumed to be larger than the speciation rate  
795 we obtain the reverse effect (Hole<Cup<Dome). These results show that despite our  
796 prior assumptions about extinction rate, the hole-nesting taxa will have the greatest  
797 influence in the direction of net diversification than cup or dome nesters. And finally, the  
798 state dome always has the smallest effect on net diversification in absolute value.  
799 These results might only be applicable to a trait that does not influence diversification,  
800 as we have shown using hidden state and character independent models for nest type  
801 (figure 2). Whether this pattern of finding similar differences in diversification is  
802 sustained in the face of enhanced extinction holds for all traits in SSE models remains  
803 to be tested.  
804

Zenil-Ferguson, R.; McEntee, J.P.; Burleigh, J.G.; and Duckworth, R.A. - Nest type linked to diversification

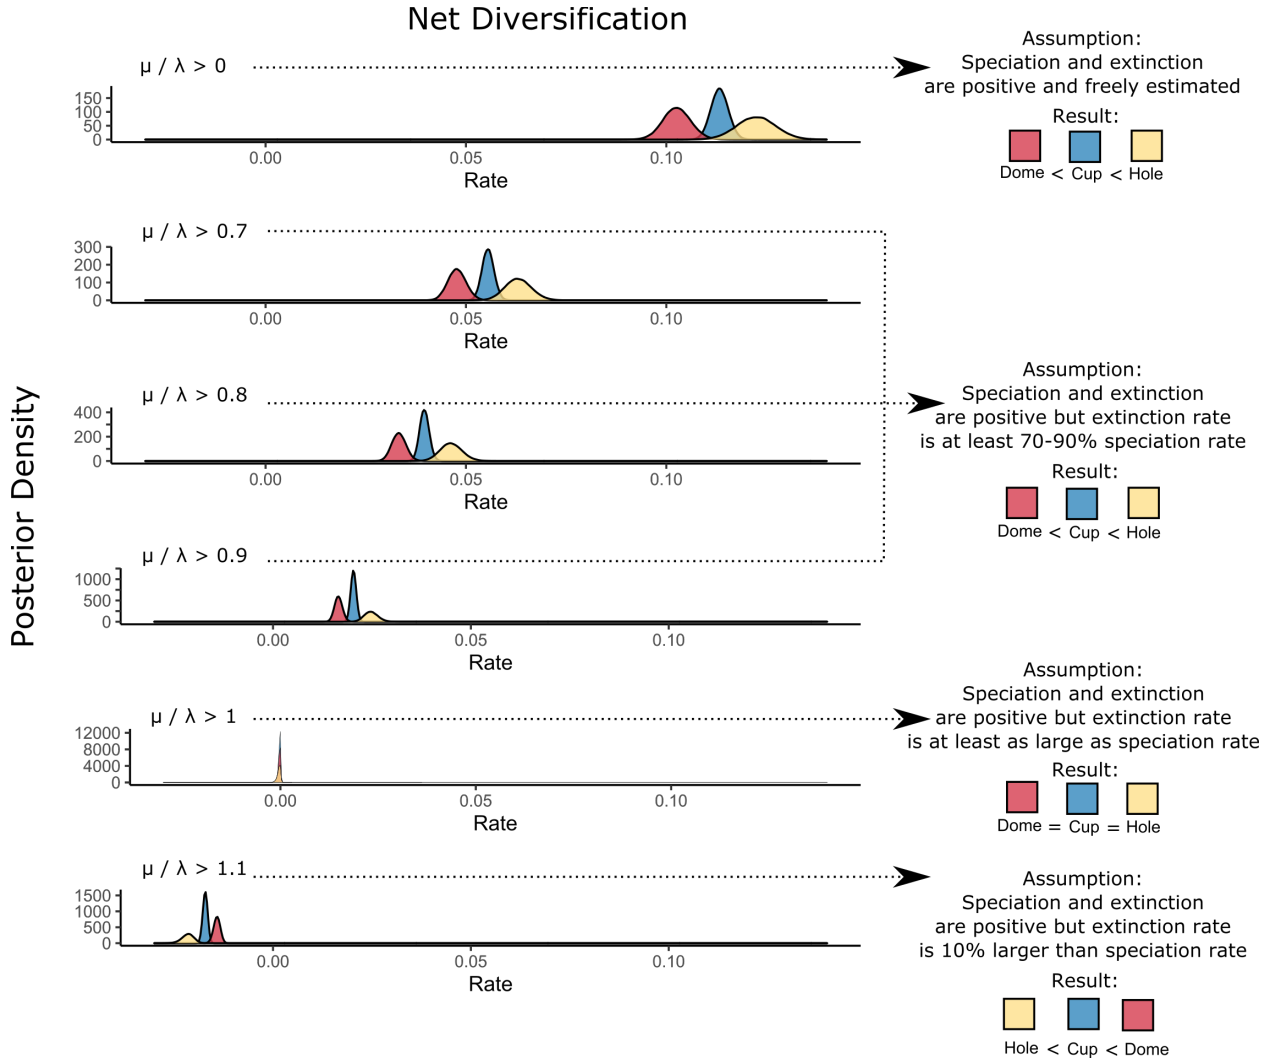

805

806 **Figure A1.** Different *a priori* assumptions about the minimum of extinction fraction ( $a =$

807  $\frac{\mu}{\lambda}$ ). When speciation and extinction are estimated freely ( $a > 0$ ), the posterior

808 distributions for net diversification show that the rate of diversification for hole is faster

809 than cup, and both are faster than dome net diversification. This inference is supported

810 even when we assume that extinction rate should be faster (in other words for cases

811 where  $a > 0.7, a > 0.8, a > 0.9$  for all states) but still smaller than speciation; however,

812 this assumption changes the overall scale leading to smaller net diversification values.

813 The inference from net diversification starts changing when we assumed  $a > 1$ , that is,



*Zenil-Ferguson, R.; McEntee, J.P.; Burleigh, J.G.; and Duckworth, R.A. - Nest type linked to diversification*

814 that extinction is at least as fast as speciation for every state, where we found that  
815 posterior distributions of net diversifications for every state overlap. Once we assumed  
816 that extinction is much faster than speciation ( $a > 1.1$ ), we found a mirror trend in the  
817 inference with hole net diversification being the slowest, and dome being the fastest.  
818
